# Supplementary material
Source: PubMed Central journal article supplement (PMC2843504)
Supplement: NIHMS183675-supplement-supp_data.pdf [file NIHMS183675-supplement-supp_data.pdf]

Supplementary Table 1. Open reading frames with hybridization levels below background in both the wild type and *rrp1* knockout strains

| Gene number | Annotation                                                               |
|-------------|--------------------------------------------------------------------------|
| BB0001      | hypothetical protein                                                     |
| BB0002      | beta-N-acetylhexosaminidase, putative                                    |
| BB0003      | hypothetical protein                                                     |
| BB0004      | phosphoglucomutase ( <i>femD</i> )                                       |
| BB0005      | tryptophanyl-tRNA synthetase ( <i>trsA</i> )                             |
| BB0008      | conserved hypothetical protein                                           |
| BB0009      | hypothetical protein                                                     |
| BB0015      | uridine kinase ( <i>udk</i> )                                            |
| BB0025      | conserved hypothetical protein                                           |
| BB0029      | conserved hypothetical protein                                           |
| BB0033      | small protein ( <i>smpB</i> )                                            |
| BB0036      | DNA topoisomerase IV ( <i>parE</i> )                                     |
| BB0038      | hypothetical protein                                                     |
| BB0040      | chemotaxis protein methyltransferase ( <i>cheR-1</i> )                   |
| BB0041      | conserved hypothetical protein                                           |
| BB0053      | uracil DNA glycosylase ( <i>ung</i> )                                    |
| BB0060      | conserved hypothetical protein                                           |
| BB0062      | hypothetical protein                                                     |
| BB0063      | hypothetical protein                                                     |
| BB0071      | hypothetical protein                                                     |
| BB0072      | hypothetical protein                                                     |
| BB0073      | hypothetical protein                                                     |
| BB0076      | signal recognition particle-docking protein FtsY ( <i>ftsY</i> )         |
| BB0077      | hypothetical protein                                                     |
| BB0079      | hypothetical protein                                                     |
| BB0081      | conserved hypothetical protein                                           |
| BB0102      | hypothetical protein                                                     |
| BB0116      | PTS system, maltose and glucose-specific IIABC component ( <i>malX</i> ) |
| BB0130      | hypothetical protein                                                     |
| BB0143      | conserved hypothetical protein                                           |
| BB0148      | hypothetical protein                                                     |
| BB0150      | hypothetical protein                                                     |
| BB0168      | <i>dnaK</i> suppressor, putative                                         |
| BB0187      | hypothetical protein                                                     |
| BB0199      | hypothetical protein                                                     |
| BB0206      | conserved hypothetical protein                                           |
| BB0208      | hypothetical protein                                                     |
| BB0223      | hypothetical protein                                                     |
| BB0234      | conserved hypothetical integral membrane protein                         |
| BB0239      | deoxyguanosine/deoxyadenosine kinase(I) subunit 2 ( <i>dck</i> )         |
| BB0247      | conserved hypothetical protein                                           |
| BB0259      | hypothetical protein                                                     |
| BB0263      | signal peptidase I ( <i>lepB-3</i> )                                     |

BB0276 flagellar biosynthesis protein (fliZ)  
BB0288 flagellum-specific ATP synthase (fliI)  
BB0295 heat shock protein (hslU)  
BB0310 hypothetical protein  
BB0312 purine-binding chemotaxis protein (cheW-1)  
BB0315 hypothetical protein  
BB0318 methylgalactoside ABC transporter, ATP-binding protein (mglA)  
BB0320 hypothetical protein  
BB0322 hypothetical protein  
BB0326 hypothetical protein  
BB0331 hypothetical protein  
BB0335 oligopeptide ABC transporter, ATP-binding protein (oppF)  
BB0347 fibronectin/fibrinogen-binding protein, putative  
BB0352 hypothetical protein  
BB0353 hypothetical protein  
BB0354 hypothetical protein  
BB0368 glycerol-3-phosphate dehydrogenase, NAD(P)<sup>+</sup> (gpsA)  
BB0369 ATP-dependent Clp protease, subunit A (clpA)  
BB0374 hypothetical protein  
BB0375 5'-methylthioadenosine/S-adenosylhomocysteine nucleosidase  
BB0378 hypothetical protein  
BB0384 basic membrane protein C (bmpC)  
BB0385 basic membrane protein D (bmpD)  
BB0399 hypothetical protein  
BB0400 hypothetical protein  
BB0401 glutamate transporter, putative  
BB0403 hypothetical protein  
BB0409 hypothetical protein  
BB0410 hypothetical protein  
BB0411 endonuclease precursor (nucA)  
BB0412 hypothetical protein  
BB0413 conserved hypothetical integral membrane protein  
BB0414 chemotaxis protein methyltransferase (cheR-2)  
BB0417 adenylate kinase (adk)  
BB0421 hydrolase  
BB0428 hypothetical protein  
BB0430 conserved hypothetical protein  
BB0432 hypothetical protein  
BB0433 hypothetical protein  
BB0434 stage 0 sporulation protein J (spo0J)  
BB0438 DNA polymerase III, subunit beta (dnaN)  
BB0447 Na<sup>+</sup>/H<sup>+</sup> antiporter (napA)  
BB0449 conserved hypothetical protein  
BB0450 RNA polymerase sigma-54 factor (ntrA)  
BB0452 hypothetical protein  
BB0453 conserved hypothetical protein

|        |                                                                   |
|--------|-------------------------------------------------------------------|
| BB0454 | lipopolysaccharide biosynthesis-related protein                   |
| BB0456 | hypothetical protein                                              |
| BB0459 | hypothetical protein                                              |
| BB0460 | hypothetical protein                                              |
| BB0474 | hypothetical protein                                              |
| BB0506 | hemolysin (tlyA)                                                  |
| BB0507 | hypothetical protein                                              |
| BB0516 | rRNA methylase (yacO)                                             |
| BB0519 | grpE protein (grpE)                                               |
| BB0523 | hypothetical protein                                              |
| BB0524 | inositol monophosphatase                                          |
| BB0527 | conserved hypothetical protein                                    |
| BB0528 | aldose reductase, putative                                        |
| BB0532 | hypothetical protein                                              |
| BB0535 | hypothetical protein                                              |
| BB0546 | hypothetical protein                                              |
| BB0547 | conserved hypothetical protein                                    |
| BB0549 | hypothetical protein                                              |
| BB0552 | DNA ligase (lig)                                                  |
| BB0555 | hypothetical protein                                              |
| BB0556 | hypothetical protein                                              |
| BB0564 | hypothetical protein                                              |
| BB0565 | purine-binding chemotaxis protein (cheW-2)                        |
| BB0566 | hypothetical protein                                              |
| BB0574 | conserved hypothetical integral membrane protein                  |
| BB0592 | hypothetical protein                                              |
| BB0616 | conserved hypothetical integral membrane protein                  |
| BB0623 | transcription-repair coupling factor (mfd)                        |
| BB0632 | exodeoxyribonuclease V, alpha chain (recD)                        |
| BB0633 | exodeoxyribonuclease V, beta chain (recB)                         |
| BB0634 | exodeoxyribonuclease V, gamma chain (recC)                        |
| BB0639 | spermidine/putrescine ABC transporter, (potD)                     |
| BB0657 | ribose 5-phosphate isomerase (rpi)                                |
| BB0673 | conserved hypothetical protein                                    |
| BB0674 | hypothetical protein                                              |
| BB0684 | carotenoid biosynthesis protein, putative                         |
| BB0707 | hypothetical protein                                              |
| BB0717 | conserved hypothetical integral membrane protein                  |
| BB0721 | CDP-diacylglycerol-glycerol-3-phosphate 3-phosphatidyltransferase |
| BB0734 | conserved hypothetical protein                                    |
| BB0737 | histidine phosphokinase/phosphatase, putative                     |
| BB0739 | hypothetical protein                                              |
| BB0740 | conserved hypothetical protein                                    |
| BB0745 | endonuclease III (nth)                                            |
| BB0750 | hypothetical protein                                              |
| BB0751 | hypothetical protein                                              |

BB0753 membrane spanning protein, putative  
BB0758 hypothetical protein  
BB0761 conserved hypothetical protein  
BB0762 hypothetical protein  
BB0764 sensory transduction histidine kinase, putative  
BB0768 pyridoxal kinase (pdxK)  
BB0771 RNA polymerase sigma factor (rpoS)  
BB0772 flagellar P-ring protein (flgI)  
BB0773 hypothetical protein  
BB0776 hypothetical protein  
BB0790 hypothetical protein  
BB0793 thymidylate kinase (tmk)  
BB0797 DNA mismatch repair protein (mutS)  
BB0798 competence protein F, putative  
BB0803 tRNA pseudouridine 55 synthase (truB)  
BB0806 hypothetical protein  
BB0807 conserved hypothetical integral membrane protein  
BB0808 hypothetical protein  
BB0811 hypothetical protein  
BB0812 pantothenate metabolism flavoprotein (dfp)  
BB0813 hypothetical protein  
BB0814 pantothenate permease (panF)  
BB0815 conserved hypothetical protein  
BB0821 2-methylthio-N6-isopentyladenosine tRNA modification (miaA)  
BB0823 hypothetical protein  
BB0826 hypothetical protein  
BB0830 exonuclease SbcC (sbcC)  
BB0835 phosphomannomutase (cpsG)  
BB0836 excinuclease ABC, subunit B (uvrB)  
BB0838 hypothetical protein  
BB0840 hypothetical protein  
BB0843.1 hypothetical protein, pseudogene  
BB0845.1 hypothetical protein, pseudogene  
BB0845.2 hypothetical protein, pseudogene  
BB0847 hypothetical protein  
BB0848 hypothetical protein  
BB0848.1 hypothetical protein, pseudogene  
BB0849.1 hypothetical protein, pseudogene  
BB0849.2 hypothetical protein, pseudogene  
BB0853 conserved hypothetical protein, authentic frameshift  
BB0853.1 hypothetical protein, paralogous family 57, pseudogene  
BB0853.2 hypothetical protein, pseudogene  
BBA02 hypothetical protein  
BBA04 antigen, S2  
BBA05 antigen, S1  
BBA06 hypothetical protein

|       |                                                      |
|-------|------------------------------------------------------|
| BBA08 | conserved hypothetical protein                       |
| BBA09 | conserved hypothetical protein                       |
| BBA10 | conserved hypothetical protein                       |
| BBA14 | conserved hypothetical protein                       |
| BBA17 | hypothetical protein                                 |
| BBA24 | decorin binding protein A (dbpA)                     |
| BBA25 | decorin binding protein B (dbpB)                     |
| BBA26 | hypothetical protein                                 |
| BBA27 | hypothetical protein                                 |
| BBA28 | hypothetical protein                                 |
| BBA29 | hypothetical protein                                 |
| BBA31 | conserved hypothetical protein                       |
| BBA38 | hypothetical protein                                 |
| BBA44 | hypothetical protein                                 |
| BBA45 | conserved hypothetical protein                       |
| BBA48 | hypothetical protein                                 |
| BBA49 | hypothetical protein                                 |
| BBA50 | hypothetical protein                                 |
| BBA53 | hypothetical protein                                 |
| BBA54 | hypothetical protein                                 |
| BBA56 | hypothetical protein                                 |
| BBA57 | hypothetical protein                                 |
| BBA58 | hypothetical protein                                 |
| BBA63 | hypothetical protein                                 |
| BBA65 | hypothetical protein                                 |
| BBA66 | antigen, P35, putative                               |
| BBA71 | hypothetical protein                                 |
| BBA72 | hypothetical protein                                 |
| BBA75 | hypothetical protein                                 |
| BBB01 | conserved hypothetical protein                       |
| BBB02 | hypothetical protein                                 |
| BBB03 | hypothetical protein                                 |
| BBB04 | PTS system, cellobiose-specific IIC component (celB) |
| BBB05 | PTS system, cellobiose-specific IIA component (celC) |
| BBB06 | PTS system, cellobiose-specific IIB component (celA) |
| BBB07 | outer surface protein, putative                      |
| BBB08 | hypothetical protein                                 |
| BBB09 | hypothetical protein                                 |
| BBB11 | conserved hypothetical protein                       |
| BBB12 | plasmid partition protein, putative                  |
| BBB13 | conserved hypothetical protein                       |
| BBB15 | hypothetical protein                                 |
| BBB20 | hypothetical protein                                 |
| BBB21 | hypothetical protein                                 |
| BBB26 | hypothetical protein                                 |
| BBC01 | conserved hypothetical protein                       |

|         |                                                |
|---------|------------------------------------------------|
| BBC02   | conserved hypothetical protein                 |
| BBC03   | conserved hypothetical protein                 |
| BBC05   | conserved hypothetical protein                 |
| BBC06   | exported protein A (eppA)                      |
| BBC07   | hypothetical protein                           |
| BBC10   | rev protein (rev)                              |
| BBD001  | conserved hypothetical protein                 |
| BBD01   | hypothetical protein, paralogous family 76     |
| BBD02   | hypothetical protein                           |
| BBD05.1 | conserved hypothetical protein, pseudogene     |
| BBD06   | hypothetical protein                           |
| BBD12   | hypothetical protein                           |
| BBD14   | conserved hypothetical protein                 |
| BBD15   | hypothetical protein, paralogous family 85     |
| BBD16   | hypothetical protein                           |
| BBD19   | hypothetical protein                           |
| BBD20   | transposase-like protein, authentic frameshift |
| BBD21   | plasmid partition protein, putative            |
| BBD23   | transposase-like protein, authentic frameshift |
| BBD24   | hypothetical protein                           |
| BBD25   | hypothetical protein                           |
| BBE01   | hypothetical protein                           |
| BBE02   | hypothetical protein                           |
| BBE03   | hypothetical protein                           |
| BBE04   | hypothetical protein                           |
| BBE04.1 | protein p23, pseudogene                        |
| BBE05   | hypothetical protein                           |
| BBE06   | hypothetical protein                           |
| BBE07   | pfs protein, pseudogene                        |
| BBE08   | hypothetical protein                           |
| BBE09   | protein p23                                    |
| BBE10   | hypothetical protein                           |
| BBE11   | hypothetical protein                           |
| BBE12   | hypothetical protein                           |
| BBE13   | hypothetical protein                           |
| BBE14   | hypothetical protein                           |
| BBE15   | hypothetical protein                           |
| BBE16   | hypothetical protein                           |
| BBE17   | hypothetical protein                           |
| BBE18   | conserved hypothetical protein                 |
| BBE19   | plasmid partition protein, putative            |
| BBE20   | conserved hypothetical protein                 |
| BBE21.1 | transposase-related protein, pseudogene        |
| BBE22   | pyrazinamidase/nicotinamidase (pncA)           |
| BBE23   | hypothetical protein                           |
| BBE23.1 | hypothetical protein, authentic frameshift     |

|         |                                                                  |
|---------|------------------------------------------------------------------|
| BBE25   | hypothetical protein                                             |
| BBE26   | hypothetical protein                                             |
| BBE28   | hypothetical protein                                             |
| BBE29   | adenine specific DNA methyltransferase, authentic frameshift     |
| BBE29.1 | conserved hypothetical protein, pseudogene                       |
| BBE32   | conserved hypothetical protein, authentic frameshift             |
| BBF001  | conserved hypothetical protein, pseudogene                       |
| BBF02   | conserved hypothetical protein                                   |
| BBF03   | conserved hypothetical protein                                   |
| BBF04   | hypothetical protein                                             |
| BBF05   | hypothetical protein                                             |
| BBF06   | conserved hypothetical protein                                   |
| BBF08   | hypothetical protein                                             |
| BBF09   | hypothetical protein, paralogous family 71, authentic frameshift |
| BBF10   | hypothetical protein                                             |
| BBF11   | hypothetical protein                                             |
| BBF11.1 | conserved hypothetical protein, pseudogene                       |
| BBF12   | conserved hypothetical protein, authentic point mutation         |
| BBF13   | plasmid partition protein, putative                              |
| BBF14   | conserved hypothetical protein                                   |
| BBF14.1 | hypothetical protein, paralogous family 65, authentic frameshift |
| BBF17   | hypothetical protein                                             |
| BBF20   | conserved hypothetical protein                                   |
| BBF21   | hypothetical protein                                             |
| BBF23   | conserved hypothetical protein                                   |
| BBF24   | plasmid partition protein, putative                              |
| BBF25   | conserved hypothetical protein                                   |
| BBF26.1 | conserved hypothetical protein, pseudogene                       |
| BBF27   | hypothetical protein                                             |
| BBF28   | hypothetical protein                                             |
| BBF30   | hypothetical protein                                             |
| BBF32   | vls recombination cassettes Vls2-Vls16, authentic frameshift     |
| BBG01   | hypothetical protein                                             |
| BBG02   | conserved hypothetical protein                                   |
| BBG03   | conserved hypothetical protein, authentic frameshift             |
| BBG07   | conserved hypothetical protein                                   |
| BBG08   | plasmid partition protein, putative                              |
| BBG10   | hypothetical protein                                             |
| BBG11   | hypothetical protein                                             |
| BBG13   | hypothetical protein                                             |
| BBG14   | hypothetical protein                                             |
| BBG15   | hypothetical protein                                             |
| BBG16   | hypothetical protein                                             |
| BBG17   | hypothetical protein                                             |
| BBG21   | hypothetical protein                                             |
| BBG22   | hypothetical protein                                             |

|         |                                                      |
|---------|------------------------------------------------------|
| BBG23   | hypothetical protein                                 |
| BBG25   | conserved hypothetical protein                       |
| BBG26   | hypothetical protein                                 |
| BBG27   | conserved hypothetical protein                       |
| BBG28   | hypothetical protein                                 |
| BBG30   | hypothetical protein                                 |
| BBG31   | conserved hypothetical protein                       |
| BBG32   | replicative DNA helicase, putative                   |
| BBG34   | hypothetical protein                                 |
| BBH01   | conserved hypothetical protein                       |
| BBH02   | conserved hypothetical protein                       |
| BBH03   | hypothetical protein                                 |
| BBH04   | cdsD protein                                         |
| BBH07   | conserved hypothetical protein, authentic frameshift |
| BBH09   | hypothetical protein                                 |
| BBH09.1 | conserved hypothetical protein, pseudogene           |
| BBH10   | hypothetical protein                                 |
| BBH11   | hypothetical protein                                 |
| BBH11.1 | conserved hypothetical protein, pseudogene           |
| BBH12   | hypothetical protein                                 |
| BBH14   | hypothetical protein                                 |
| BBH15   | hypothetical protein                                 |
| BBH16   | hypothetical protein                                 |
| BBH17   | hypothetical protein                                 |
| BBH18   | hypothetical protein                                 |
| BBH18.1 | conserved hypothetical protein, pseudogene           |
| BBH19   | hypothetical protein                                 |
| BBH20.1 | conserved hypothetical protein, pseudogene           |
| BBH22   | hypothetical protein                                 |
| BBH24   | hypothetical protein                                 |
| BBH24.1 | conserved hypothetical protein, pseudogene           |
| BBH25   | hypothetical protein                                 |
| BBH29   | conserved hypothetical protein                       |
| BBH30   | conserved hypothetical protein, authentic frameshift |
| BBH31   | hypothetical protein                                 |
| BBH32   | antigen, P35, putative                               |
| BBH33   | hypothetical protein                                 |
| BBH35   | hypothetical protein                                 |
| BBH36   | hypothetical protein                                 |
| BBH36.1 | conserved hypothetical protein, pseudogene           |
| BBH36.2 | conserved hypothetical protein, pseudogene           |
| BBH37   | hypothetical protein                                 |
| BBH38   | hypothetical protein                                 |
| BBH39   | hypothetical protein                                 |
| BBH40   | transposase-like protein, putative                   |
| BBH41   | conserved hypothetical protein                       |



|         |                                                            |
|---------|------------------------------------------------------------|
| BBI01   | hypothetical protein                                       |
| BBI02   | conserved hypothetical protein                             |
| BBI02.1 | conserved hypothetical protein, pseudogene                 |
| BBI02.2 | Brute Force ORF                                            |
| BBI03   | hypothetical protein                                       |
| BBI04   | hypothetical protein                                       |
| BBI05   | hypothetical protein                                       |
| BBI06   | 5'-methylthioadenosine/S-adenosylhomocysteine nucleosidase |
| BBI07   | hypothetical protein                                       |
| BBI08   | hypothetical protein                                       |
| BBI09   | hypothetical protein                                       |
| BBI10   | hypothetical protein                                       |
| BBI11   | hypothetical protein                                       |
| BBI12   | hypothetical protein                                       |
| BBI13   | conserved hypothetical protein                             |
| BBI14   | hypothetical protein                                       |
| BBI15   | hypothetical protein                                       |
| BBI16   | hypothetical protein                                       |
| BBI17   | hypothetical protein                                       |
| BBI18   | hypothetical protein                                       |
| BBI20   | conserved hypothetical protein                             |
| BBI21   | plasmid partition protein, putative                        |
| BBI22   | conserved hypothetical protein                             |
| BBI24   | hypothetical protein                                       |
| BBI25   | hypothetical protein                                       |
| BBI26   | multidrug-efflux transporter                               |
| BBI27   | hypothetical protein                                       |
| BBI28   | hypothetical protein                                       |
| BBI30   | hypothetical protein                                       |
| BBI31   | conserved hypothetical protein                             |
| BBI31.1 | conserved hypothetical protein, pseudogene                 |
| BBI32   | hypothetical protein                                       |
| BBI34   | hypothetical protein                                       |
| BBI35   | hypothetical protein                                       |
| BBI36   | antigen, P35, putative                                     |
| BBI40   | conserved hypothetical protein, pseudogene                 |
| BBI41   | hypothetical protein                                       |
| BBI42   | outer membrane protein, putative                           |
| BBI43   | conserved hypothetical protein                             |
| BBJ001  | conserved hypothetical protein, pseudogene                 |
| BBJ01   | hypothetical protein                                       |
| BBJ02.1 | conserved hypothetical protein, pseudogene                 |
| BBJ03   | hypothetical protein                                       |
| BBJ04   | hypothetical protein                                       |
| BBJ06   | hypothetical protein                                       |
| BBJ07   | hypothetical protein                                       |

|         |                                                         |
|---------|---------------------------------------------------------|
| BBJ07.1 | conserved hypothetical protein, pseudogene              |
| BBJ11   | hypothetical protein                                    |
| BBJ12.1 | hypothetical protein, paralogous family 124, pseudogene |
| BBJ13   | hypothetical protein                                    |
| BBJ15   | hypothetical protein                                    |
| BBJ15.1 | conserved hypothetical protein, pseudogene              |
| BBJ17   | plasmid partition protein, putative                     |
| BBJ18   | conserved hypothetical protein                          |
| BBJ20   | hypothetical protein                                    |
| BBJ21   | hypothetical protein                                    |
| BBJ21.1 | conserved hypothetical protein, pseudogene              |
| BBJ23   | hypothetical protein                                    |
| BBJ25   | hypothetical protein                                    |
| BBJ26   | ABC transporter, ATP-binding protein                    |
| BBJ27   | hypothetical protein                                    |
| BBJ28   | hypothetical protein                                    |
| BBJ29   | hypothetical protein                                    |
| BBJ31   | hypothetical protein                                    |
| BBJ32   | hypothetical protein                                    |
| BBJ33   | hypothetical protein                                    |
| BBJ35   | hypothetical protein                                    |
| BBJ36   | hypothetical protein                                    |
| BBJ37   | hypothetical protein                                    |
| BBJ38   | hypothetical protein                                    |
| BBJ39   | hypothetical protein                                    |
| BBJ40   | hypothetical protein                                    |
| BBJ42   | hypothetical protein                                    |
| BBJ44   | hypothetical protein                                    |
| BBJ46   | hypothetical protein                                    |
| BBJ47   | hypothetical protein                                    |
| BBJ48   | hypothetical protein                                    |
| BBK02   | hypothetical protein                                    |
| BBK02.1 | conserved hypothetical protein, pseudogene              |
| BBK03   | hypothetical protein                                    |
| BBK04   | hypothetical protein                                    |
| BBK05   | hypothetical protein                                    |
| BBK07   | hypothetical protein                                    |
| BBK08   | hypothetical protein                                    |
| BBK09   | hypothetical protein                                    |
| BBK12   | hypothetical protein                                    |
| BBK14   | hypothetical protein                                    |
| BBK15   | antigen, P35, putative                                  |
| BBK20   | hypothetical protein                                    |
| BBK21   | plasmid partition protein, putative                     |
| BBK24.1 | hypothetical protein                                    |
| BBK25   | transposase-like protein, authentic frameshift          |

BBK25.1 conserved hypothetical protein, pseudogene  
BBK26 hypothetical protein  
BBK27 hypothetical protein  
BBK28 hypothetical protein  
BBK29 hypothetical protein  
BBK31 hypothetical protein  
BBK32 immunogenic protein P35  
BBK33 hypothetical protein  
BBK35 hypothetical protein  
BBK36 hypothetical protein  
BBK37 immunogenic protein P37, authentic frameshift  
BBK38 hypothetical protein  
BBK42 hypothetical protein  
BBK42.1 conserved hypothetical protein, pseudogene  
BBK43 hypothetical protein  
BBK44 hypothetical protein  
BBK46 immunogenic protein P37, authentic frameshift  
BBK49 hypothetical protein  
BBK50 immunogenic protein P37  
BBK51 hypothetical protein  
BBK52 protein p23  
BBK52.1 conserved hypothetical protein, pseudogene  
BBK54 conserved hypothetical protein  
BBL14 hypothetical protein  
BBL18 hypothetical protein  
BBL27 conserved hypothetical protein  
BBL30 conserved hypothetical protein  
BBL33 hypothetical protein  
BBL34 conserved hypothetical protein  
BBL36 conserved hypothetical protein  
BBL41 hypothetical protein  
BBL42 hypothetical protein  
BBL43 conserved hypothetical protein  
BBM04 hypothetical protein  
BBM10 conserved hypothetical protein  
BBM14 hypothetical protein  
BBM16 hypothetical protein  
BBM18 hypothetical protein  
BBM27 rev protein (rev)  
BBM33 conserved hypothetical protein  
BBM37 conserved hypothetical protein  
BBM39 hypothetical protein  
BBM40 hypothetical protein  
BBM42 conserved hypothetical protein  
BBN16 hypothetical protein, paralogous family 157, authentic frameshift  
BBN18 hypothetical protein, paralogous family 160, authentic point mutation

|       |                                                                       |
|-------|-----------------------------------------------------------------------|
| BBN29 | hypothetical protein, paralogous family 161, authentic point mutation |
| BBN33 | conserved hypothetical protein                                        |
| BBN36 | conserved hypothetical protein                                        |
| BBN37 | hypothetical protein, paralogous family 96, authentic point mutation  |
| BBN40 | hypothetical protein                                                  |
| BBN43 | conserved hypothetical protein                                        |
| BBO01 | hypothetical protein                                                  |
| BBO15 | hypothetical protein                                                  |
| BBO17 | hypothetical protein                                                  |
| BBO18 | hypothetical protein                                                  |
| BBO29 | hypothetical protein                                                  |
| BBO32 | plasmid partition protein, putative                                   |
| BBO34 | conserved hypothetical protein                                        |
| BBO35 | hypothetical protein                                                  |
| BBO37 | conserved hypothetical protein                                        |
| BBO40 | erpM protein (erpM)                                                   |
| BBO42 | hypothetical protein                                                  |
| BBO43 | hypothetical protein                                                  |
| BBP16 | hypothetical protein                                                  |
| BBP18 | hypothetical protein                                                  |
| BBP25 | conserved hypothetical protein                                        |
| BBP27 | rev protein (rev)                                                     |
| BBP40 | hypothetical protein                                                  |
| BBP42 | conserved hypothetical protein                                        |
| BBQ01 | conserved hypothetical protein                                        |
| BBQ02 | hypothetical protein                                                  |
| BBQ03 | outer membrane protein, putative                                      |
| BBQ05 | antigen, P35, putative                                                |
| BBQ08 | plasmid partition protein, putative                                   |
| BBQ09 | conserved hypothetical protein                                        |
| BBQ10 | hypothetical protein                                                  |
| BBQ18 | hypothetical protein                                                  |
| BBQ19 | hypothetical protein                                                  |
| BBQ23 | hypothetical protein                                                  |
| BBQ34 | conserved hypothetical protein                                        |
| BBQ36 | hypothetical protein                                                  |
| BBQ38 | conserved hypothetical protein                                        |
| BBQ39 | conserved hypothetical protein                                        |
| BBQ41 | conserved hypothetical protein                                        |
| BBQ43 | conserved hypothetical protein                                        |
| BBQ45 | conserved hypothetical protein                                        |
| BBQ46 | hypothetical protein                                                  |
| BBQ47 | erpX protein (erpX)                                                   |
| BBQ49 | hypothetical protein                                                  |
| BBQ54 | hypothetical protein                                                  |
| BBQ55 | hypothetical protein                                                  |

|         |                                                          |
|---------|----------------------------------------------------------|
| BBQ56   | hypothetical protein                                     |
| BBQ58   | hypothetical protein                                     |
| BBQ61   | hypothetical protein                                     |
| BBQ62   | hypothetical protein                                     |
| BBQ65   | conserved hypothetical protein, pseudogene               |
| BBQ66   | hypothetical protein                                     |
| BBQ68   | hypothetical protein                                     |
| BBQ69   | hypothetical protein, family 115 paralog, pseudogene     |
| BBQ70   | hypothetical protein                                     |
| BBQ71   | multidrug efflux transporter, pseudogene                 |
| BBQ72   | hypothetical protein                                     |
| BBQ73   | conserved hypothetical protein, pseudogene               |
| BBQ74   | conserved hypothetical protein, pseudogene               |
| BBQ75   | conserved hypothetical protein, pseudogene               |
| BBQ76   | hypothetical protein                                     |
| BBQ77   | transposase-like protein, pseudogene                     |
| BBQ78   | hypothetical protein                                     |
| BBQ79   | hypothetical protein, pseudogene                         |
| BBQ81   | conserved hypothetical protein, pseudogene               |
| BBQ82   | hypothetical protein                                     |
| BBQ84   | hypothetical protein                                     |
| BBQ84.1 | pseudogene                                               |
| BBR15   | hypothetical protein                                     |
| BBR20   | conserved hypothetical protein                           |
| BBR30   | hypothetical protein                                     |
| BBR33   | plasmid partition protein, putative                      |
| BBR35   | conserved hypothetical protein, authentic point mutation |
| BBR37   | conserved hypothetical protein                           |
| BBR39   | hypothetical protein                                     |
| BBR40   | erpH protein (erpH)                                      |
| BBR43   | hypothetical protein                                     |
| BBR44   | hypothetical protein                                     |
| BBR45   | conserved hypothetical protein                           |
| BBS18   | hypothetical protein                                     |
| BBS27   | hypothetical protein                                     |
| BBS28   | hypothetical protein                                     |
| BBS33   | conserved hypothetical protein                           |
| BBS40   | conserved hypothetical protein                           |
| BBS42   | associated protein A (bapA)                              |
| BBS43   | hypothetical protein                                     |
| BBT01   | hypothetical protein                                     |
| BBT02   | conserved hypothetical protein                           |
| BBT03   | hypothetical protein                                     |
| BBT04   | conserved hypothetical protein                           |
| BBT05   | hypothetical protein, family 57 paralog, pseudogene      |
| BBT06   | conserved hypothetical protein                           |

|       |                                                      |
|-------|------------------------------------------------------|
| BBU02 | hypothetical protein                                 |
| BBU03 | hypothetical protein                                 |
| BBU04 | conserved hypothetical protein                       |
| BBU05 | plasmid partition protein, putative                  |
| BBU11 | conserved hypothetical protein                       |
| BBU12 | conserved hypothetical protein, authentic frameshift |

---

Supplementary Table 2. Oligonucleotides used in this study

| Oligonucleotide                    | Sequence (5' → 3')                         |
|------------------------------------|--------------------------------------------|
| <b>General <i>rrp1</i> primers</b> |                                            |
| BB0420F3135 (1)                    | TGTGCGCTATGTAGCGTCTTTTG                    |
| BB0420R3435 (2)                    | TGGAACCAAATCCTCAAAATCC                     |
| BB0420F4277 (3)                    | CCTTCTCAACAACTTTTAATTG                     |
| BB0419R199 (4)                     | GACCTATGTCAAGAAGTATAAG                     |
| BB0419F113 (5)                     | ACGAGATTGAGGTTGCAACAAATG                   |
| BB0419R459 (6)                     | TGGAATTTGAGTAAGCCCATC                      |
| BB0419F_LIC (7)                    | GACGACGACAAGATGGAAATGATAATTAAGATAAAGC      |
| BB0419R_LIC (8)                    | GAGGAGAAGCCCGGTTTAATATCTAAACTGATTTCTTCCAG  |
| BB0419F-RT (9)                     | TTGAGGTTGCAACAAATGGA                       |
| BB0419R-RT (10)                    | CGGGATCGCTTTTTAGCTTT                       |
| 419KO-upF (11)                     | GCCCATTAATGTTTTAATAGCTGA                   |
| 419KO-upR (12)                     | ACCGGTCTAGACGTCTTTATCTTTAATTATCATTTCCACTGT |
| 419KO-dnF (13)                     | GACGTCCTGGAAGAAATCAGTTTAGATAATAAA          |
| 419KO-dnR (14)                     | ACCGGTGCTTATTATCCTCCCCACGAG                |
| spec/strep F (15)                  | TGATTTGCTGGTTACGGTGA                       |
| spec/strep R (16)                  | ATTTGCCGACTACCTTGGTG                       |
| aad1-5'-R (17)                     | TCCTTGAAGCTCGGGTATTA                       |
| pKFSS1-3'F (18)                    | GGCGAGATCACCAAGGTAGTC                      |
| KOverifyUp F (19)                  | CTTTAATGGGGCTTGGTATATGC                    |
| <b>Real time RT-PCR primers</b>    |                                            |
| BB0167QF                           | TTGGAAGAAGAGATGCACGA                       |
| BB0167QR                           | TGGTTTTTGAGATCCCCATC                       |
| BBO241QF                           | ATTTGGACAAGCCTGCCTTA                       |
| BBO241QR                           | TTCCCCATGCAATTGAAGTT                       |
| BBO242QF                           | TGTTTGGCAAGCAAATAAATCA                     |
| BB0242QR                           | TGCTCCAATGAATTTTACCTTTT                    |
| BB0243QF                           | TGCGGTAGACGCAATTACAA                       |
| BB0243QR                           | CGCGCAAAGCTTCTTTAACT                       |
| BB0367QF                           | AGAGCATATTGTAGAATGCTTCG                    |
| BB0367QR                           | TTTTTGTTAAATCGTCTCTTTTGA                   |
| BB0420QF                           | TGGCAAGTCGAATACCCTCT                       |
| BB0420QR                           | TGTTTCGATTTTATTGGGATGC                     |
| BB0450QF                           | TGTTTTTGCTCCACCAACAG                       |
| BB0450QR                           | AGGCCAATGAACTTGAGCAT                       |
| BB0596QF                           | GCCCATCATCAGAGAACCTT                       |
| BB0596QR                           | CAAGCGTTGAACAGTCCTCA                       |
| BB0629QF                           | TTCCTCCTGCCATTATGCTT                       |
| BB0629QR                           | AGCTTTGCTTGGAGGAATGA                       |
| BB0683QF                           | AGGCGTTGATCATTCAAAGG                       |
| BB0683QR                           | GCAAAGACATAGCAGCACCA                       |

|          |                            |
|----------|----------------------------|
| BB0687QF | TTGGTTCAAGTGCTGTCGTT       |
| BB0687QR | CCACTGCCTATTCCTCCTTG       |
| BB0769QF | AGCCTCTCCACAAGCATCAT       |
| BB0769QR | AGCCTCTCCACAAGCATCAT       |
| BB0771QF | TCGGGTCATATTTTTCAGCA       |
| BB0771QR | AGGCAATGCAAAAGCAAAAA       |
| BBA30QF  | GACCTGGCAGAAGAAAGCAC       |
| BBA30QR  | CCTTTCAGCCTCATTTTTGG       |
| BBB16QF  | GCCAAATGTTTCTTGGCATT       |
| BBB16QR  | TCGGCAGTAATGGAAACTCC       |
| BBB17QF  | TTTCGGGTTTTTGTCTATTT       |
| BBB17QR  | CCATTGCTAAAGAGGGTGGA       |
| BBB18QF  | AAGCAATGCGCAAATAAAGA       |
| BBB18QR  | TAAAATTTGCCAAGCCCAAA       |
| BBB19QF  | GAAAGAGGTTGAAGCGTTGC       |
| BBB19QR  | ATTGCATAAGCTCCCGCTAA       |
| BBH06QF  | CCCCCTCAAGTTCTACAGCA       |
| BBH06QR  | TTGAGTGTATTGTGAAAATAATTGGA |
| BBN38QF  | CAATGACTAAAGGCGGATCAT      |
| BBN38QR  | ACGCAATATGTTTCAGCACCA      |
| BBL39QF  | TGATGAGCAAAGCAATGGAG       |
| BBL39QR  | AAACCCGTTTCAATACCATCTTT    |
| BBA68QF  | GCGCACCTTTTAGCAAAAATC      |
| BBA68QR  | GCTCTGAAGCGATAGTTTCCAT     |
| BBM38QF  | CCAGAAGCAAAAGTTCAACCA      |
| BBM38QR  | TCAGCAACACCTTGAACCAC       |
| BBO39QF  | GCAAAGAAAAAGGGGGAGAG       |
| BBO39QR  | GCCTTGAGTTTTCCAGTTG        |
| BBR42QF  | AAAACCAAGCTGAATCTGCAA      |
| BBR42QR  | CCCCAACTATTAGCACACTGC      |

**Plasmid-specific primers**

|        |                             |
|--------|-----------------------------|
| BBA16F | GCACAAAAAGGTGCTGAG          |
| BBA16R | CACTTGCTGATCCTTCAG          |
| BBB19F | AATAATTCAGGGAAAGATGGG       |
| BBB19R | AGGTTTTTTTTGGACTTTCTGCC     |
| BBC10F | GAACTATTTATAATAAAAAGGAGAGC  |
| BBC10R | ATCTTCTTCAAGATATTTTATTATAC  |
| BBD21F | CTACCTTAAGCGGAAATATTGC      |
| BBD21R | GAATAATTCTTCGCTCCCAAAGCTC   |
| BBE16F | ATGGGTAAAATATTATTTTTGGG     |
| BBE16R | AAGATTGTATTTTGGCAAAAAATTTTC |
| BBF20F | ATGAACAAAAAATTTTCTATTTC     |
| BBF20R | GTTGCTTTTGCAATATGAATAGG     |
| BBG02F | TCCCTAGTTCTAGTATCTACTAGACCG |
| BBG02R | TTTTTTTTGTATGCCAATTGTATAATG |



|           |                             |
|-----------|-----------------------------|
| BBH28F    | GGCTTCAATTAAGGGAGGAG        |
| BBH28R    | CACAATATAATCCGCAACATTC      |
| BBI26F    | GCAAGGACTTTGCCACATGCTG      |
| BBI26R    | CGAAATAGCACATAGATAATTCC     |
| BBJ34F    | AAATTCTATGGAAGTGATG         |
| BBJ34R    | TTTATCTTTATTTTTAGGC         |
| BBK19F    | AAGTTTATGTTTATTATTCG        |
| BBK19R    | ATTGTTAGGTTTTTCTTTTCC       |
| BBL32/33F | GAAGATTTAAACAAAAAATTGCG     |
| BBL32/33R | GTAATCACTTCTTTTTTACCATCG    |
| BBM32F    | GACTTTACATAGTATAAATGCTTTTGG |
| BBM32R    | TCTCGTTATTATAAAATAAGTAGG    |
| BBN32/33F | TATCAAAAAAGTGCTGTTTTATAG    |
| BBN32/33R | TAATCTCAAATATTCTTCTTTATG    |
| BBO32F    | GGAATGTATTAATTGATAATTCAG    |
| BBO32R    | GCGAAATAAATAGTGCCTTATGGG    |
| BBP33F    | ACGATAGGGTAATATCAAAAAAGG    |
| BBP33R    | AGTTCATCTAATAAAAAATCCCGTG   |
| BBQ47F    | AAGATTGATGCAACTGGTAAAG      |
| BBQ47R    | CTGACTGTAAGTATGTATCC        |
| BBR33F    | AGATCCTCAAATAGTTTAACCAG     |
| BBR33R    | TTAATATTGGCAGAGAGTCTACAG    |
| BBS53F    | TTACGAAAAAATAGAAAAACTAGG    |
| BBS53R    | TTTCCACTGCCCACTTTTCAGCCG    |
| LP5F      | CTTGCTTTAAGCCCTATTTTAC      |
| LP5R      | GCACACTACCCATTTTTGAATC      |
| BBU21F    | AGTAAAGGAGTTCTGCAAAAATT     |
| BBU21R    | GTTGTCACCTCGTGTAATATG       |

---
